# Supplementary material for: Induction of Invertebrate Larval Settlement; Different Bacteria, Different Mechanisms?
Source: PubMed Central journal article supplement (PMC5307369; doi:10.1038/srep42557), 2017-02-14
Supplement: srep42557-s1.pdf [file srep42557-s1.pdf]

**Supplementary Material for:  
Induction of Invertebrate Larval Settlement; Different  
Bacteria, Different Mechanisms?**

**Marnie L Freckelton, Brian T Nedved, and Michael G  
Hadfield\***

**Kewalo Marine Laboratory, University of Hawaii,  
Honolulu, 96813, USA  
\*hadfield@Hawaii.edu**

## Experimental Scheme

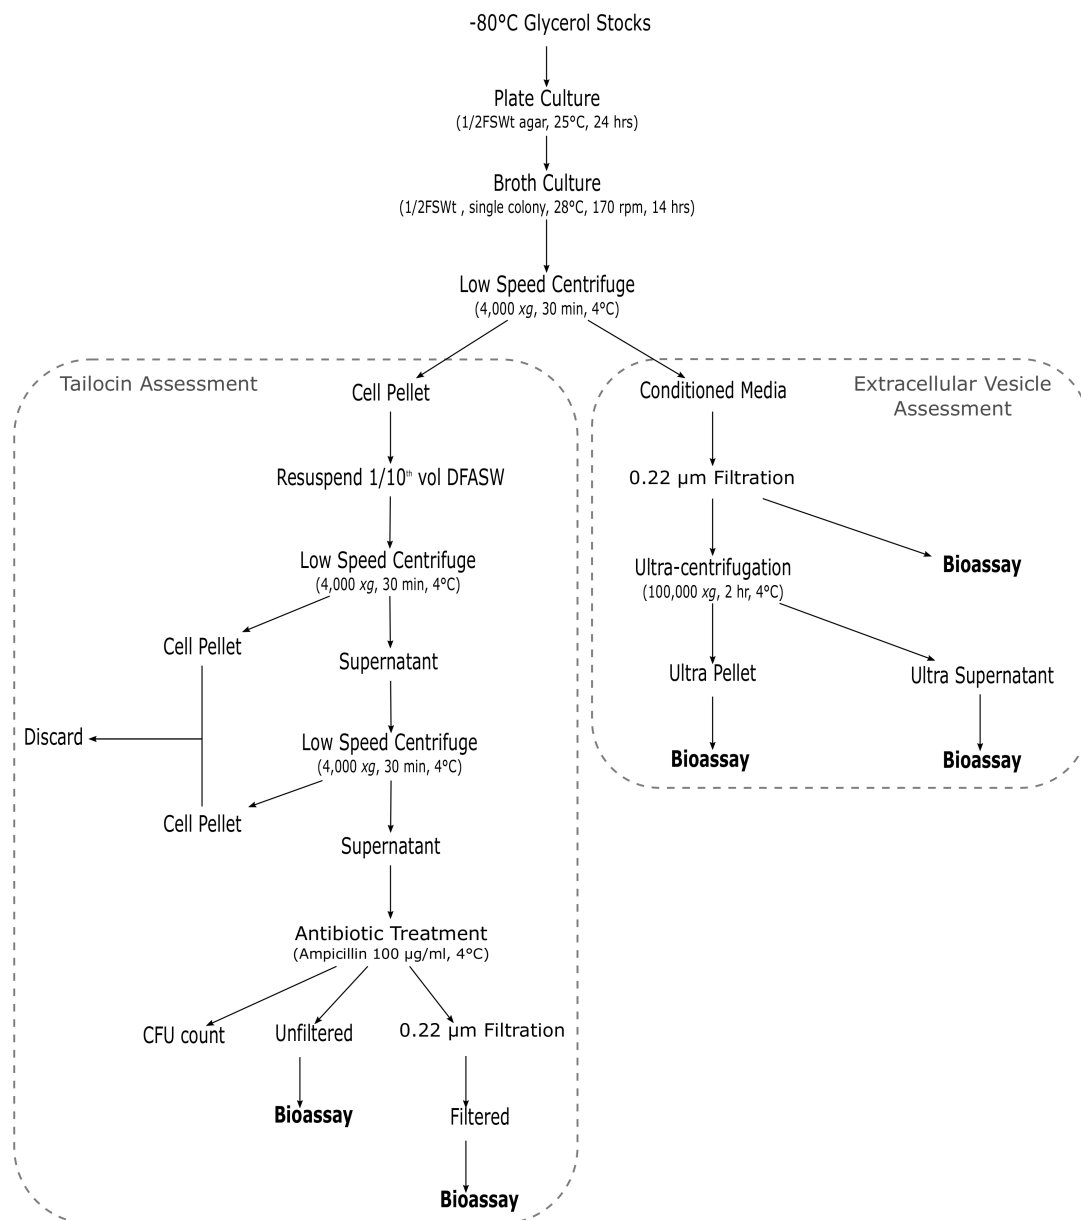

**Figure 1.** Flow chart of methodology for both tailocin and extracellular vesicle assessments identifying bioassay samples. Methodology was followed in side by side preparations for all four bacterial species (*P. luteoviolacea*, *C. lytica*, *B. aquimaris* and *S. warneri*).

## Genomic Assessment Tables

| ORF Name    | Amino Acid Accession Num. | Protein Name                    | Length (Amino Acids) |
|-------------|---------------------------|---------------------------------|----------------------|
| MacS        | AHX39703.1                | Phage Tail Sheath Protein FI    | 581                  |
| MacT2       | AHX39702.1                | t4-like Virus Tail Tube Protein | 148                  |
| MacT1       | AHX39701.1                | t4-like Virus Tail Tube Protein | 153                  |
| MacB (ORF1) | AHX39695.1                | Baseplate J-like Protein        | 1070                 |
| ORF2        | AHX39694.1                | Hypothetical Protein            | 890                  |
| ORF3        | AHX39693.1                | Hypothetical Protein            | 1671                 |
| JF50_12590  | AHX39721.1                | Hypothetical Protein            | 139                  |
| JF50_12595  | AHX39720.1                | Hypothetical Protein            | 135                  |
| JF50_12600  | AHX39719.1                | Hypothetical Protein            | 131                  |
| JF50_12605  | AHX39718.1                | Hypothetical Protein            | 747                  |
| JF50_12610  | AHX39717.1                | Hypothetical Protein            | 496                  |
| JF50_12615  | AHX39716.1                | Hypothetical Protein            | 943                  |

**Table 1.** Inductive genes from *Pseudoalteromonas luteoviolacea*. ORF, Open Reading Frame

| ORF Name    | Query Coverage (%) | Identity (%) | e-Value | Accession Number of Best Amino Acid Hit |
|-------------|--------------------|--------------|---------|-----------------------------------------|
| MacS        | 12                 | 30           | 0.68    | WP_051983455.1                          |
| MacT2       | 39                 | 23           | 4.5     | WP_013621992.1                          |
| MacT1       | 37                 | 28           | 0.64    | WP_013619596.1                          |
| MacB (ORF1) | 9                  | 26           | 0.49    | WP_051983451.1                          |
| ORF2        | 7                  | 28           | 0.17    | WP_051983452.1                          |
| ORF3        | 6                  | 35           | 0.35    | WP_051983429.1                          |
| JF50_12590  | NA                 | NA           | NA      | No Hits                                 |
| JF50_12595  | NA                 | NA           | NA      | No Hits                                 |
| JF50_12600  | NA                 | NA           | NA      | No Hits                                 |
| JF50_12605  | NA                 | NA           | NA      | No Hits                                 |
| JF50_12610  | NA                 | NA           | NA      | No Hits                                 |
| JF50_12615  | NA                 | NA           | NA      | No Hits                                 |

**Table 2.** Summary of BLAST searches in genome of *C. lytica*. ORF, Open Reading Frame

| ORF Name    | Query Coverage (%) | Identity (%) | e-Value | Accession Number of Best Amino Acid Hit |
|-------------|--------------------|--------------|---------|-----------------------------------------|
| MacS        | 5                  | 35           | 0.53    | WP_044339398.1                          |
| MacT2       | NA                 | NA           | NA      | No Hits                                 |
| MacT1       | 13                 | 43           | 2.3     | WP_044339905.1                          |
| MacB (ORF1) | 4                  | 23           | 3.7     | WP_044337912.1                          |
| ORF2        | NA                 | NA           | NA      | No Hits                                 |
| ORF3        | NA                 | NA           | NA      | No Hits                                 |
| JF50_12590  | 58                 | 24           | 4.9     | WP_064090927.1                          |
| JF50_12595  | NA                 | NA           | NA      | No Hits                                 |
| JF50_12600  | NA                 | NA           | NA      | No Hits                                 |
| JF50_12605  | 8                  | 33           | 2       | WP_032088594.1                          |
| JF50_12610  | 6                  | 46           | 4.5     | WP_64091692.1                           |
| JF50_12615  | 5                  | 37           | 4       | WP_64094184.1                           |

**Table 3.** Summary of BLAST searches in genome of *B. aquimaris*. ORF, Open Reading Frame

| ORF Name    | Query Coverage (%) | Identity (%) | e-Value | Accession Number of Best Amino Acid Hit |
|-------------|--------------------|--------------|---------|-----------------------------------------|
| MacS        | NA                 | NA           | NA      | No Hits                                 |
| MacT2       | NA                 | NA           | NA      | No Hits                                 |
| MacT1       | NA                 | NA           | NA      | No Hits                                 |
| MacB (ORF1) | 2                  | 3            | 0.098   | WP_002451828.1                          |
| ORF2        | NA                 | NA           | NA      | No Hits                                 |
| ORF3        | 3                  | 36           | 0.48    | WP_002451828.1                          |
| JF50_12590  | 15                 | 43           | 6.2     | WP_015364611.1                          |
| JF50_12595  | NA                 | NA           | NA      | No Hits                                 |
| JF50_12600  | NA                 | NA           | NA      | No Hits                                 |
| JF50_12605  | 2                  | 45           | 2.1     | WP_002466879.1                          |
| JF50_12610  | NA                 | NA           | NA      | No Hits                                 |
| JF50_12615  | 6                  | 28           | 8.7     | WP_002466879.1                          |

**Table 4.** Summary of BLAST searches in genome of *S. warneri*. ORF, Open Reading Frame
